# Supplementary material
Source: MDPI journal article supplement (https://www.mdpi.com/2674-1164/2/1/11)
Supplement: s1 [file s1]

**Table S1**

Weight loss (g) of eggs from laying hens fed  $\beta$ -mannanase (BMA) depending on the storage time.

| Treatments                      | Storage period (days) |       |        |       |       |       |       |
|---------------------------------|-----------------------|-------|--------|-------|-------|-------|-------|
|                                 | 1                     | 7     | 14     | 21    | 28    | 35    | 42    |
| <b>Phase 1 – 36 to 40 weeks</b> |                       |       |        |       |       |       |       |
| <b>Control</b>                  | 1.017                 | 1.673 | 1.748  | 2.691 | 3.251 | 3.750 | 1.017 |
| <b>BMA</b>                      | 0.744                 | 1.168 | 1.221  | 2.591 | 3.223 | 3.653 | 0.744 |
| <i>P-value</i> <sup>1</sup>     | 0.004                 | 0.099 | <0.001 | 0.434 | 0.839 | 0.526 | 0.004 |
| SE <sup>2</sup>                 | 0.598                 | 0.661 | 0.794  | 0.684 | 0.842 | 0.599 | 0.598 |
| <b>Phase 2 – 41 to 44 weeks</b> |                       |       |        |       |       |       |       |
| <b>Control</b>                  | 0.736                 | 1.242 | 2.056  | 2.387 | 2.923 | 3.807 | 0.736 |
| <b>BMA</b>                      | 0.756                 | 1.315 | 2.024  | 2.515 | 3.098 | 3.717 | 0.756 |
| <i>P-value</i>                  | 0.537                 | 0.160 | 0.612  | 0.130 | 0.244 | 0.607 | 0.537 |
| SE                              | 0.969                 | 0.755 | 0.609  | 0.651 | 0.664 | 0.697 | 0.969 |
| <b>Phase 3 – 45 to 48 weeks</b> |                       |       |        |       |       |       |       |
| <b>Control</b>                  | 0.615                 | 1.348 | 1.523  | 2.137 | 2.439 | 3.675 | 0.615 |
| <b>BMA</b>                      | 0.541                 | 1.221 | 1.562  | 2.300 | 2.121 | 3.263 | 0.541 |
| <i>P-value</i>                  | 0.131                 | 0.152 | 0.708  | 0.241 | 0.291 | 0.020 | 0.131 |
| SE                              | 0.645                 | 0.855 | 0.853  | 0.741 | 0.773 | 0.690 | 0.645 |

<sup>1</sup> Probability of treatment effect.

<sup>2</sup> Standard error.

Table S2

Albumen height of eggs from laying hens fed  $\beta$ -mannanase (BMA) depending on the storage time

| Treatments                  | Storage period (days) |       |       |       |       |       |       |
|-----------------------------|-----------------------|-------|-------|-------|-------|-------|-------|
|                             | 1                     | 7     | 14    | 21    | 28    | 35    | 42    |
| Phase 1 – 36 to 40 weeks    |                       |       |       |       |       |       |       |
| <b>Control</b>              | 9.34                  | 6.03  | 4.74  | 3.97  | 3.24  | 2.98  | 2.70  |
| <b>BMA</b>                  | 9.69                  | 5.90  | 4.30  | 3.67  | 3.16  | 2.88  | 2.76  |
| <i>P-value</i> <sup>1</sup> | 0.347                 | 0.461 | 0.044 | 0.096 | 0.538 | 0.534 | 0.644 |
| SE <sup>2</sup>             | 0.186                 | 0.087 | 0.110 | 0.089 | 0.068 | 0.081 | 0.059 |
| Phase 2 – 41 to 44 weeks    |                       |       |       |       |       |       |       |
| <b>Control</b>              | 6.83                  | 5.33  | 3.92  | 3.23  | 2.74  | 2.75  | 2.62  |
| <b>BMA</b>                  | 6.65                  | 4.91  | 3.58  | 2.89  | 2.58  | 2.57  | 2.67  |
| <i>P-value</i>              | 0.504                 | 0.007 | 0.058 | 0.016 | 0.242 | 0.173 | 0.531 |
| SE                          | 0.135                 | 0.080 | 0.089 | 0.072 | 0.066 | 0.062 | 0.041 |
| Phase 3 – 45 to 48 weeks    |                       |       |       |       |       |       |       |
| <b>Control</b>              | 7.97                  | 5.49  | 4.74  | 3.67  | 2.96  | 2.66  | 2.68  |
| <b>BMA</b>                  | 7.83                  | 5.28  | 4.30  | 3.13  | 2.82  | 2.48  | 2.47  |
| <i>P-value</i>              | 0.576                 | 0.294 | 0.051 | 0.016 | 0.245 | 0.057 | 0.106 |
| SE                          | 0.121                 | 0.092 | 0.086 | 0.115 | 0.059 | 0.040 | 0.062 |

<sup>1</sup> Probability of treatment effect.<sup>2</sup> Standard error.

**Table S3**

Yolk length (mm) of eggs from laying hens fed  $\beta$ -mannanase (BMA) depending on the storage time.

| Treatments                      | Storage period (days) |       |       |       |       |       |       |
|---------------------------------|-----------------------|-------|-------|-------|-------|-------|-------|
|                                 | 1                     | 7     | 14    | 21    | 28    | 35    | 42    |
| <b>Phase 1 – 36 to 40 weeks</b> |                       |       |       |       |       |       |       |
| <b>Control</b>                  | 40.63                 | 43.49 | 45.02 | 49.84 | 47.91 | 50.00 | 49.29 |
| <b>BMA</b>                      | 41.25                 | 44.38 | 45.58 | 45.85 | 48.00 | 49.84 | 51.67 |
| <i>P-value</i> <sup>1</sup>     | 0.319                 | 0.262 | 0.391 | 0.005 | 0.914 | 0.895 | 0.012 |
| SE <sup>2</sup>                 | 0.304                 | 0.392 | 0.318 | 0.738 | 0.397 | 0.588 | 0.661 |
| <b>Phase 2 – 41 to 44 weeks</b> |                       |       |       |       |       |       |       |
| <b>Control</b>                  | 41.43                 | 44.73 | 45.89 | 47.80 | 50.39 | 47.90 | 51.59 |
| <b>BMA</b>                      | 42.52                 | 42.80 | 45.67 | 47.42 | 48.15 | 48.50 | 51.91 |
| <i>P-value</i>                  | 0.021                 | 0.008 | 0.713 | 0.564 | 0.022 | 0.416 | 0.739 |
| SE                              | 0.242                 | 0.380 | 0.292 | 0.312 | 0.500 | 0.359 | 0.563 |
| <b>Phase 3 – 45 to 48 weeks</b> |                       |       |       |       |       |       |       |
| <b>Control</b>                  | 39.94                 | 42.03 | 46.63 | 46.08 | 46.08 | 48.06 | 50.00 |
| <b>BMA</b>                      | 41.10                 | 42.63 | 45.40 | 46.10 | 45.47 | 47.96 | 49.04 |
| <i>P-value</i>                  | 0.024                 | 0.301 | 0.099 | 0.977 | 0.328 | 0.928 | 0.418 |
| SE                              | 0.262                 | 0.285 | 0.373 | 0.371 | 0.309 | 0.541 | 0.581 |

<sup>1</sup> Probability of treatment effect.

<sup>2</sup> Standard error.

**Table S4**Yolk weight (g) of eggs from laying hens fed  $\beta$ -mannanase (BMA) depending on the storage time.

| Treatments                      | Storage period (days) |       |       |        |       |       |       |
|---------------------------------|-----------------------|-------|-------|--------|-------|-------|-------|
|                                 | 1                     | 7     | 14    | 21     | 28    | 35    | 42    |
| <b>Phase 1 – 36 to 40 weeks</b> |                       |       |       |        |       |       |       |
| <b>Control</b>                  | 17.86                 | 16.73 | 17.38 | 16.51  | 16.51 | 16.21 | 16.34 |
| <b>BMA</b>                      | 17.98                 | 17.02 | 16.61 | 16.62  | 16.62 | 16.93 | 18.29 |
| <i>P-value</i> <sup>1</sup>     | 0.827                 | 0.650 | 0.184 | 0.841  | 0.705 | 0.294 | 0.003 |
| SE <sup>2</sup>                 | 0.185                 | 0.267 | 0.308 | 0.284  | 0.251 | 0.335 | 0.352 |
| <b>Phase 2 – 41 to 44 weeks</b> |                       |       |       |        |       |       |       |
| <b>Control</b>                  | 16.75                 | 17.73 | 17.10 | 17.47  | 17.00 | 16.16 | 16.18 |
| <b>BMA</b>                      | 16.51                 | 16.87 | 17.36 | 16.09  | 16.29 | 16.46 | 16.51 |
| <i>P-value</i>                  | 0.464                 | 0.104 | 0.066 | <0.001 | 0.086 | 0.520 | 0.026 |
| SE                              | 0.159                 | 0.265 | 0.290 | 0.205  | 0.208 | 0.225 | 0.271 |
| <b>Phase 3 – 45 to 48 weeks</b> |                       |       |       |        |       |       |       |
| <b>Control</b>                  | 14.75                 | 15.87 | 17.95 | 18.67  | 17.98 | 17.23 | 18.04 |
| <b>BMA</b>                      | 15.38                 | 16.49 | 17.00 | 18.28  | 17.82 | 17.86 | 17.56 |
| <i>P-value</i>                  | 0.027                 | 0.116 | 0.104 | 0.374  | 0.699 | 0.245 | 0.375 |
| SE                              | 0.147                 | 0.221 | 0.294 | 0.216  | 0.204 | 0.264 | 0.268 |

<sup>1</sup> Probability of treatment effect.<sup>2</sup> Standard error.

**Table S5**

Total solids of eggs from laying hens fed  $\beta$ -mannanase (BMA).

| Treatments                  | Albumen | Yolk  |
|-----------------------------|---------|-------|
| Control                     | 11.65   | 46.88 |
| BMA                         | 12.02   | 47.04 |
| <i>P-value</i> <sup>1</sup> | 0.570   | 0.851 |
| SE <sup>2</sup>             | 0.18    | 0.26  |

<sup>1</sup> Probability of treatment effect.

<sup>2</sup> Standard error.
